# Supplementary material for: Valorization of the use of Waste Agricultural Materials for the Anodic Oxidation of Amaranth Red (E123) using SS/PbO2 Anodes Elaborated by Pulsed Mode Current
Source: Research Square preprint supplement (doi:10.21203/rs.3.rs-230438/v1), 2021-02-24
Supplement: Supplementary file 1 [file 7f056e3c1af2d4beea3ad00a.docx]

**Graphical abstract**

**
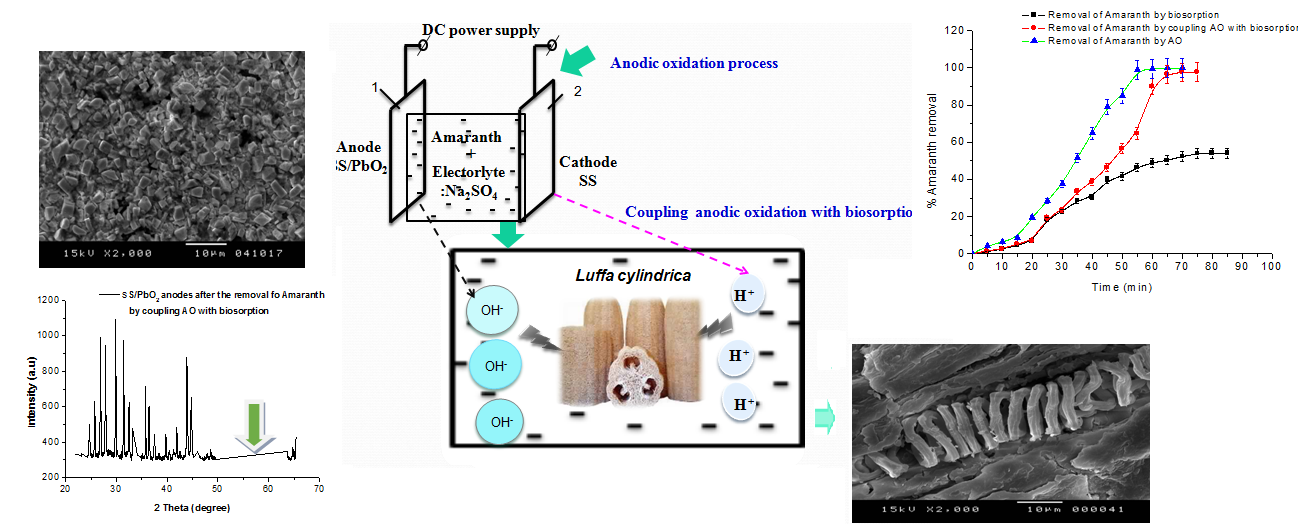
**

**Highlights**

- Coupling biosorption with anodic oxidation offers high efficiency at low energy consumption when degrading Amaranth Red (E123)
- Coupling process is proved to be effective for the enhancement of the stability of SS/PbO2 anodes
- *Luffa cylindrica*  ability for reuse was confirmed after three regeneration cycles
